# Supplementary material for: Differential Expression of the Apolipoprotein AI Gene in Spotnape Ponyfish (Nuchequula nuchalis) Inhabiting Different Salinity Ranges at the Top of the Estuary and in the Deep-Bay Area of Gwangyang Bay, South Korea
Source: MDPI journal article supplement (doi:10.3390/ijerph182010960), 2021-10-19
Supplement: s1 [file s1]

Supplementary Table S1. Species information used in phylogenetic analysis.

| Species Name                                          | Gene            | GenBank Accession Number |
|-------------------------------------------------------|-----------------|--------------------------|
| <i>N. nuchalis</i> in the study                       | ApoAI           | MZ851746                 |
| <i>Etheostoma cragini</i> (Gilbert, 1885)             | ApoA-Ib         | XP_034724041             |
| <i>Perca fluviatilis</i> (Linnaeus, 1758)             | ApoAI-like      | XP_039643066             |
| <i>Morone saxatilis</i> (Walbaum, 1792)               | ApoAI-like      | XP_035536036             |
| <i>Echeneis naucrates</i> (Linnaeus, 1758)            | ApoAI-like      | XP_029373375             |
| <i>Seriola lalandi dorsalis</i> (Valenciennes, 1833)  | ApoA-IV         | XP_023256300             |
| <i>Micropterus salmoides</i> (Lacepède, 1802)         | ApoAI-like      | XP_038585910             |
| <i>Rachycentron canadum</i> (Linnaeus, 1766)          | ApoAI           | ACV50420                 |
| <i>Sander lucioperca</i> (Linnaeus, 1758)             | ApoA-Ib         | XP_031139526             |
| <i>Toxotes jaculatrix</i> (Pallas, 1767)              | ApoA-Ib         | XP_040903009             |
| <i>Seriola dumerili</i> (Risso, 1810)                 | ApoA-IV         | XP_022616173             |
| <i>Anoplopoma fimbria</i> (Pallas, 1814)              | ApoAI precursor | ACQ58664                 |
| <i>Perca flavescens</i> (Mitchill, 1814)              | ApoAI-like      | XP_028427328             |
| <i>Scophthalmus maximus</i> (Linnaeus, 1758)          | ApoAI-like      | XP_035478339             |
| <i>Lates calcarifer</i> (Bloch, 1790)                 | ApoAI-like      | XP_018543131             |
| <i>Astatotilapia calliptera</i> (Günther, 1894)       | ApoA-IV         | XP_026047886             |
| <i>Liparis tanakae</i> (Gilbert & Burke, 1912)        | ApoAI           | TNN34591                 |
| <i>Epinephelus coioides</i> (Hamilton, 1822)          | ApoAI           | ACM48181                 |
| <i>Epinephelus akaara</i> (Temminck & Schlegel, 1842) | ApoAI           | AGT02114                 |
| <i>Pungitius pungitius</i> (Linnaeus, 1758)           | ApoA-Ib         | XP_037317114             |
| <i>Larimichthys crocea</i> (Richardson, 1846)         | ApoAI           | XP_010743548             |
| <i>Parambassis ranga</i> (Hamilton, 1822)             | ApoAI-like      | XP_028275332             |
| <i>Channa argus</i> (Cantor, 1842)                    | ApoAI           | KAF3693043               |
| <i>Notothenia coriiceps</i> (Richardson, 1844)        | ApoAI           | XP_010792180             |
| <i>Chelmon rostratus</i> (Linnaeus, 1758)             | ApoA-Ib         | XP_041796720             |
| <i>Cyclopterus lumpus</i> (Linnaeus, 1758)            | ApoA-Ib         | XP_034404235             |
| <i>Epinephelus lanceolatus</i> (Bloch, 1790)          | ApoA-Ib         | XP_033487725             |
| <i>Gymnodraco acuticeps</i> (Boulenger, 1902)         | ApoAI-like      | XP_034058693             |
| <i>Oryzias melastigma</i> (McClelland, 1839)          | ApoAI           | AEA51138                 |
| <i>Gasterosteus aculeatus</i> (Linnaeus, 1758)        | ApoAI-like      | XP_040046834             |
| <i>Anabas testudineus</i> (Bloch, 1792)               | ApoAI           | XP_026230177             |
| <i>Hippoglossus hippoglossus</i> (Linnaeus, 1758)     | ApoA-Ib         | XP_034459733             |
| <i>Fundulus heteroclitus</i> (Linnaeus, 1766)         | ApoAI           | XP_012728061             |
| <i>Collichthys lucidus</i> (Richardson, 1844)         | ApoAI           | TKS81356                 |
| <i>Austrofundulus limnaeus</i> (Schultz, 1949)        | ApoA-IV         | XP_013881474             |
| <i>Xiphias gladius</i> (Linnaeus, 1758)               | ApoA-Ib         | XP_039987748             |
| <i>Homo sapiens</i>                                   | ApoAI           | X02162                   |
| <i>Mus musculus</i>                                   | ApoAI           | NM_009692                |
| <i>Rattus norvegicus</i>                              | ApoAI           | NP_036870                |
| <i>Macaca fascicularis</i>                            | ApoAI           | NP_001270674             |
| <i>Saimiri boliviensis</i>                            | ApoAI           | XP_010332821             |
